# Supplementary material
Source: MDPI journal article supplement (https://www.mdpi.com/2073-4425/12/6/870)
Supplement: s1 [file s1]

# Response to Reviewer 2 Comments

The manuscript by Zhang et al. entitled “Age prediction of human based on DNA methylation by blood tissues” is a report on age-predicting genomic DNA methylation sites selected by 1191 healthy and disease-affected samples using gradient boosting regression. The study has reported 24 common CpG sites between both datasets. These findings will be to interest of the readers of Gene, especially DNA methylation researchers in the fields of human geneticists, cancer research, and forensic science. I have, however, major and minor comments to be addressed before publication. I hope these comments will be helpful.

Major comments:

**Point 1.** In Table 5, Supplementary S1 and S2, Illumina’s CpG loci IDs are not very familiar to the readers. Add information of chromosome, coordinate (physical position), as well as reference version (GRCh36, hg18, or newer) to these tables. Newer reference versions are preferable.

**Response:** Thanks for your suggestion. We have added some information about the CpG sites in Table 5, which includes Pearson correlation coefficient both in healthy datasets and disease datasets, physical position, Gene name, and reference versions.

**Table 5.** Information about the twenty-four same CpG sites for healthy and disease datasets.

| CpG site   | Pearson correlation<br>coefficient in<br>healthy datasets | Pearson correlation<br>coefficient in<br>disease datasets | Physical<br>position<br>(chr : position) | Gene names | Reference<br>versions |
|------------|-----------------------------------------------------------|-----------------------------------------------------------|------------------------------------------|------------|-----------------------|
| cg16867657 | 0.8715                                                    | 0.8240                                                    | chr6:11044877                            | ELOVL2     | GRCh37/hg19           |
| cg22454769 | 0.7892                                                    | 0.8107                                                    | chr2:106015768                           | FHL2       | GRCh37/hg19           |
| cg19283806 | -0.7646                                                   | -0.7112                                                   | chr18:66389420                           | CCDC102B   | GRCh37/hg19           |
| cg04875128 | 0.7412                                                    | 0.6803                                                    | chr15:31775896                           | OTUD7A     | GRCh37/hg19           |
| cg10501210 | -0.7381                                                   | -0.7302                                                   | chr1:207997020                           | -          | GRCh37/hg19           |
| cg24079702 | 0.7328                                                    | 0.6829                                                    | chr2:106015772                           | FHL2       | GRCh37/hg19           |
| cg06639320 | 0.7265                                                    | 0.8027                                                    | chr2:106015740                           | FHL2       | GRCh37/hg19           |
| cg08097417 | 0.7019                                                    | 0.6814                                                    | chr7:130419134                           | KLF14      | GRCh37/hg19           |
| cg07082267 | -0.6933                                                   | -0.6650                                                   | chr16:85429036                           | -          | GRCh37/hg19           |
| cg24724428 | 0.6788                                                    | 0.6607                                                    | chr6:11044888                            | ELOVL2     | GRCh37/hg19           |
| cg09809672 | -0.6723                                                   | -0.6005                                                   | chr1:236557683                           | -          | GRCh37/hg19           |
| cg11649376 | -0.6667                                                   | -0.6361                                                   | chr12:81473234                           | ACSS3      | GRCh37/hg19           |

|            |         |         |                |        |             |
|------------|---------|---------|----------------|--------|-------------|
| cg23078123 | -0.6587 | -0.6089 | chr1:68577796  | GNG12  | GRCh37/hg19 |
| cg08262002 | -0.6525 | -0.6530 | chr4:16575323  | LDB2   | GRCh37/hg19 |
| cg21572722 | 0.6503  | 0.8270  | chr6:11044894  | ELOVL2 | GRCh37/hg19 |
| cg18933331 | -0.6463 | -0.6085 | chr1:110186419 | -      | GRCh37/hg19 |
| cg06784991 | 0.6427  | 0.6287  | chr1:53308769  | ZYG11A | GRCh37/hg19 |
| cg22736354 | 0.6370  | 0.6769  | chr6:18122719  | NHLRC1 | GRCh37/hg19 |
| cg01528542 | -0.6250 | -0.6350 | chr12:81468232 | -      | GRCh37/hg19 |
| cg23500537 | 0.6093  | 0.7347  | chr5:140419820 | -      | GRCh37/hg19 |
| cg06819923 | -0.6087 | -0.6300 | chr16:21214509 | ZP2    | GRCh37/hg19 |
| cg17110586 | 0.6035  | 0.6934  | chr19:36454623 | -      | GRCh37/hg19 |
| cg00481951 | 0.6031  | 0.6107  | chr3:187387651 | SST    | GRCh37/hg19 |
| cg03473532 | -0.6012 | -0.6310 | chr7:131008744 | MKLN1  | GRCh37/hg19 |

**Point 2.** In line 169-170, I cannot find gene annotation of each 23 CpG site. In addition to genomic positions, add information of nearly positioned genes (for example, within 1kb upstream and downstream around a CpG site) to Table 5. If some CpG sites are located near age-related genes, indicate those with proper citation. Interpretation of these results should be described in the Discussion section. If not all of the 23 CpG site are located near age-related genes, the sentence “... have a strong correlation with age” sounds too strong.

**Response:** In line 169, after “...cg16867657 is located in Human Gene ELOVL2”, we have added “Besides, from the Table 5, we can see that the twenty-four CpG sites mainly locate in Human Gene ELOVL2 and FHL2, which are considered as age-related genes”. In this part, we also selected some relevant articles and cited them (Ref 40, Ref 43-45) in the references.

Minor comments:

**Point 1.** In line 11-13 in the Abstract section, after “...we retrieved a total of 1191 samples.”, add words “of five previous reports from a public database”.

**Response:** Thank you for your comments. We have revised lines 11-13 in the Abstract section as "we retrieved a total of 1191 samples of five previous reports from a public database".
